# Supplementary material
Source: PubMed Central journal article supplement (PMC6320694)
Supplement: NIHMS1506231-supplement-1.pdf [file NIHMS1506231-supplement-1.pdf]

# HAMMERSMITH INFANT NEUROLOGICAL EXAMINATION

Name

Date of birth

Gestational age

Date of examination

Chronological age / Corrected age

Head circumference

| SUMMARY OF EXAMINATION |  |
|------------------------|--|
| Global score (max 78)  |  |
| Number of asymmetries  |  |
| Behavioural score      |  |

|                        |       |          |
|------------------------|-------|----------|
| Cranial nerve function | score | (max 15) |
| Posture                | score | (max 18) |
| Movements              | score | (max 6)  |
| Tone                   | score | (max 24) |
| Reflexes and reactions | score | (max 15) |
| <b>COMMENTS</b>        |       |          |

## NEUROLOGICAL EXAMINATION

### ASSESSMENT OF CRANIAL NERVE FUNCTION

|                                                                                                                                    | score 3                                                   | 2 | score 1                                                    | score 0                                                  | score | Asymmetry |
|------------------------------------------------------------------------------------------------------------------------------------|-----------------------------------------------------------|---|------------------------------------------------------------|----------------------------------------------------------|-------|-----------|
| <b>Facial appearance</b><br>(at rest and when crying or stimulated)                                                                | Smiles or reacts to stimuli by closing eyes and grimacing |   | Closes eyes but not tightly, poor facial expression        | Expressionless, does not react to stimuli                |       |           |
| <b>Eye movements</b>                                                                                                               | Normal conjugate eye movements                            |   | <b>Intermittent</b><br>Deviation of eyes or abnormal mvts. | <b>Continuous</b><br>Deviation of eyes or abnormal mvts. |       |           |
| <b>Auditory response</b><br>Test the response to a rattle                                                                          | Reacts to stimuli from both sides                         |   | Doubtful reaction to stimuli or asymmetry of response      | No response                                              |       |           |
| <b>Visual response</b><br>test ability to follow a black/white target                                                              | Follows the target in a complete arc                      |   | Follows the target in an incomplete or asymmetrical arc    | Does not follow the target                               |       |           |
| <b>Sucking/swallowing</b><br>Watch infant suck on breast or bottle. If older, ask about feeding, assoc. cough, excessive dribbling | Good suck and swallowing                                  |   | Poor suck and/or swallow                                   | No sucking reflex, no swallowing                         |       |           |

## ASSESSMENT OF POSTURE (note any asymmetries)

|                                       | score 3                                                                                                                                                                 | score 2                                                 | score 1                                                                                                                                        | score 0                                                                                                                                                                                                                                                                                  | sc | Comment / asymmetry |
|---------------------------------------|-------------------------------------------------------------------------------------------------------------------------------------------------------------------------|---------------------------------------------------------|------------------------------------------------------------------------------------------------------------------------------------------------|------------------------------------------------------------------------------------------------------------------------------------------------------------------------------------------------------------------------------------------------------------------------------------------|----|---------------------|
| <b>Head</b><br>in sitting             | <br>Straight; in midline                                                               |                                                         | <br>Slightly to side or backward or forward                   | <br>Markedly to side or backward or forward                                                                                                                                                            |    |                     |
| <b>Trunk</b><br>in sitting            | <br>Straight                                                                           |                                                         | <br>Slightly curved or bent to side                           | <br>Very rounded      rocketing back      bent sideways                                                                                                                                                |    |                     |
| <b>Arms</b><br>at rest                | In a neutral position, central straight or slightly bent                                                                                                                |                                                         | <b>Slight</b><br>internal rotation or external rotation<br><br><b>Intermittent</b> dystonic posture                                            | <b>Marked</b><br>internal rotation or external rotation or<br><br>dystonic posture<br>hemiplegic posture                                                                                                                                                                                 |    |                     |
| <b>Hands</b>                          | Hands open                                                                                                                                                              |                                                         | <b>Intermittent</b><br>adducted thumb or fisting                                                                                               | <b>Persistent</b><br>adducted thumb or fisting                                                                                                                                                                                                                                           |    |                     |
| <b>Legs</b><br>in sitting             | able to sit with a straight back and legs straight or slightly bent (long sitting)<br> |                                                         | sit with straight back but knees bent at 15-20 °<br>          | unable to sit straight unless knees markedly bent (no long sitting)<br><br><b>marked</b><br>internal rotation or external rotation or<br>fixed extension or flexion or contractures at hips and knees |    |                     |
| in supine and standing                | legs in neutral position straight or slightly bent                                                                                                                      | <b>Slight</b><br>internal rotation or external rotation | Internal rotation or external rotation at the hips                                                                                             |                                                                                                                                                                                                                                                                                          |    |                     |
| <b>Feet</b><br>in supine and standing | Central in neutral position<br><br>Toes straight midway between flexion and extension                                                                                   |                                                         | <b>Slight</b><br>internal rotation or external rotation<br><br><b>Intermittent</b><br>Tendency to stand on tiptoes or toes up or curling under | <b>Marked</b><br>internal rotation or external rotation at the ankle<br><br><b>Persistent</b><br>Tendency to stand on tiptoes or toes up or curling under                                                                                                                                |    |                     |

## ASSESSMENT OF MOVEMENTS

|                                                                                                             | Score 3                       | Score 2 | Score 1                    | Score 0                                                                                                                                                                                                                          | sc | asymmetry |
|-------------------------------------------------------------------------------------------------------------|-------------------------------|---------|----------------------------|----------------------------------------------------------------------------------------------------------------------------------------------------------------------------------------------------------------------------------|----|-----------|
| <b>Quantity</b><br>Watch infant lying in supine                                                             | Normal                        |         | Excessive or sluggish      | Minimal or none                                                                                                                                                                                                                  |    |           |
| <b>Quality</b><br>Observe infant's spontaneous voluntary motor activity during the course of the assessment | Free, alternating, and smooth |         | Jerky<br><br>Slight tremor | <ul style="list-style-type: none"> <li>• Cramped &amp; synchronous</li> <li>• Extensor spasms</li> <li>• Athetoid</li> <li>• Ataxic</li> <li>• Very tremulous</li> <li>• Myoclonic spasm</li> <li>• Dystonic movement</li> </ul> |    |           |

## ASSESSMENT OF TONE

|                                                                                                                                                                                              | Score 3                                                                                                             | Score 2                                                                                              | Score 1                                                                                                         | Score 0                                                                                                                    | sc | comment |
|----------------------------------------------------------------------------------------------------------------------------------------------------------------------------------------------|---------------------------------------------------------------------------------------------------------------------|------------------------------------------------------------------------------------------------------|-----------------------------------------------------------------------------------------------------------------|----------------------------------------------------------------------------------------------------------------------------|----|---------|
| <b>Scarf sign</b><br>Take the infant's hand and pull the arm across the chest until there is resistance. Note the position of the elbow in relation to the midline.                          | Range:<br>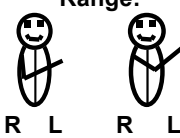<br>R L R L              |                                                                                                      | <br>R L                        | <br>R L or R L                          |    |         |
| <b>Passive shoulder elevation</b><br>Lift arm up alongside infant's head. Note resistance at shoulder and elbow.                                                                             | Resistance overcomeable<br><br>R L | Resistance difficult to overcome<br>R L                                                              | No resistance<br><br>R L       | Resistance, not overcomeable<br><br>R L |    |         |
| <b>Pronation/supination</b><br>Steady the upper arm while pronating and supinating forearm, note resistance                                                                                  | Full pronation and supination, no resistance                                                                        |                                                                                                      | Resistance to full pronation / supination overcomeable                                                          | Full pronation and supination not possible, marked resistance                                                              |    |         |
| <b>Adductors</b><br>With both the infant's legs extended, abduct them as far as possible. The angle formed by the legs is noted.                                                             | Range: 150-80°<br><br>R L R L      | 150-160°<br><br>R L | >170°<br><br>R L              | <80°<br><br>R L                         |    |         |
| <b>Popliteal angle</b><br>Keep the infant's bottom on the bed, flex both hips onto the abdomen, then extend the knees until there is resistance. Note the angle between upper and lower leg. | Range: 150°-100°<br><br>R L R L    | 150-160°<br><br>R L | ~90° or > 170°<br><br>R L R L | <80°<br><br>R L                         |    |         |
| <b>Ankle dorsiflexion</b><br>With knee extended, dorsiflex the ankle. Note the angle between foot and leg.                                                                                   | Range: 30°-85°<br><br>R L R L     | 20-30°<br><br>R L  | <20° or 90°<br><br>R L R L   | > 90°<br><br>R L                       |    |         |
| <b>Pull to sit</b><br>Pull infant to sit by the wrists. (support head if necessary)                                                                                                          |                                  |                                                                                                      |                             |                                       |    |         |
| <b>Ventral suspension</b><br>Hold infant horizontally around trunk in ventral suspension; note position of back, limbs and head.                                                             |                                  |                                                                                                      |                             |                                       |    |         |

## REFLEXES AND REACTIONS

|                                                                                                                                                                            | Score 3                                                                                                         | Score 2                                                                                    | Score 1                                                                                                                    | Score 0                                                                                                                              | sc | comment |
|----------------------------------------------------------------------------------------------------------------------------------------------------------------------------|-----------------------------------------------------------------------------------------------------------------|--------------------------------------------------------------------------------------------|----------------------------------------------------------------------------------------------------------------------------|--------------------------------------------------------------------------------------------------------------------------------------|----|---------|
| <b>Tendon Reflexes</b>                                                                                                                                                     | easily elicitable<br>biceps knee ankle                                                                          | mildly brisk<br>bicep knee ankle                                                           | brisk<br>biceps knee ankle                                                                                                 | clonus or absent<br>biceps knee ankle                                                                                                |    |         |
| <b>Arm protection</b><br>Pull the infant by one arm from the supine position (steady the contralateral hip) and note the reaction of arm on opposite side.                 | <br>arm & hand extend<br>R L |                                                                                            | <br>arm semi flexed<br>R L             | <br>arm fully flexed<br>R L                     |    |         |
| <b>Vertical suspension</b><br>hold infant under axilla making sure legs do not touch any surface – you may "tickle" feet to stimulate kicking.                             | <br>kicks symmetrically      |                                                                                            | <br>kicks one leg more or poor kicking | <br>no kicking even if stimulated or scissoring |    |         |
| <b>Lateral tilting</b> (describe side up). Hold infant up vertically near to hips and tilt sideways towards the horizontal. Note response of trunk, spine, limbs and head. | <br>R L                      | <br>L R | <br>R L                                | <br>R L                                         |    |         |
| <b>Forward parachute</b> Hold infant up vertically and quickly tilt forwards. Note reaction /symmetry of arm responses.                                                    | <br>(after 6 months)         |                                                                                            | <br>(after 6 months)                    |                                                                                                                                      |    |         |

## SECTION 2 MOTOR MILESTONES (not scored; note asymmetries)

|                                               |                                                    |                                                                                                                           |                                                                                                                              |                                                                                                                                  |                                                                                                                                        |                                                           |
|-----------------------------------------------|----------------------------------------------------|---------------------------------------------------------------------------------------------------------------------------|------------------------------------------------------------------------------------------------------------------------------|----------------------------------------------------------------------------------------------------------------------------------|----------------------------------------------------------------------------------------------------------------------------------------|-----------------------------------------------------------|
| <b>Head control</b>                           | Unable to maintain head upright<br>normal up to 3m | Wobbles<br>normal up to 4m                                                                                                | Maintained upright all the time<br>normal from 5m                                                                            |                                                                                                                                  |                                                                                                                                        | <b>Please note age at which maximum skill is achieved</b> |
| <b>Sitting</b>                                | Cannot sit                                         | With support at hips<br><br>normal at 4m | Props<br><br>normal at 6m                   | Stable sit<br><br>normal at 7-8m                | Pivots (rotates)<br><br>normal at 9m                | Observed:<br>Reported (age):                              |
| <b>Voluntary grasp – note side</b>            | No grasp                                           | Uses whole hand                                                                                                           | Index finger and thumb but immature grasp                                                                                    | Pincer grasp                                                                                                                     |                                                                                                                                        | Observed:<br>Reported (age):                              |
| <b>Ability to kick in supine</b>              | No kicking                                         | Kicks horizontally but legs do not lift                                                                                   | Upward (vertically)<br><br>normal at 3m     | Touches leg<br><br>normal at 4-5m               | Touches toes<br><br>normal at 5-6m                  | Observed:<br>Reported (age):                              |
| <b>Rolling</b>                                | No rolling                                         | Rolling to side<br>(normal at 4m)                                                                                         | Prone to supine<br>(normal at 6 m)                                                                                           | Supine to prone<br>(normal at 6 m)                                                                                               | <b>Note through which sides</b>                                                                                                        | Observed:<br>Reported (age):                              |
| <b>Crawling (C), or bottom shuffling (BS)</b> | Does not lift head                                 | On elbow<br><br>(normal at 3 m)         | On outstretched hand<br><br>(normal at 4m) | Crawling flat on abdomen<br><br>(normal at 8m) | Crawling on hands and knees<br><br>(normal at 10m) | Observed:<br>Reported (age):                              |
| <b>Standing</b>                               | Does not support weight                            | Supports weight<br>(normal at 4m)                                                                                         | Stands with support<br>(normal at 7m)                                                                                        | Stands unaided<br>(normal at 12m)                                                                                                |                                                                                                                                        | Observed:<br>Reported (age):                              |
| <b>Walking</b>                                |                                                    | Bouncing<br>(normal at 6m)                                                                                                | Cruising (walks holding on)<br>(normal at 12m)                                                                               | Walking independently<br>(normal by 15m)                                                                                         |                                                                                                                                        | Observed:<br>Reported (age):                              |

## SECTION 3 BEHAVIOUR (not scored)

|                           | 1                         | 2                            | 3                         | 4                        | 5                 | 6                  | Comment |
|---------------------------|---------------------------|------------------------------|---------------------------|--------------------------|-------------------|--------------------|---------|
| <b>Conscious state</b>    | Unrousable                | Drowsy                       | Sleep but wakes easily    | Awake but no interest    | Loses interest    | Maintains interest |         |
| <b>Emotional state</b>    | Irritable, not consolable | Irritable, carer can console | Irritable when approached | Neither happy or unhappy | Happy and smiling |                    |         |
| <b>Social orientation</b> | Avoiding, withdrawn       | Hesitant                     | Accepts approach          | Friendly                 |                   |                    |         |
